# Supplementary material for: High expression level of ROR1 and ROR1-signaling associates with venetoclax resistance in chronic lymphocytic leukemia
Source: PubMed Central journal article supplement (PMC9162914; doi:10.1038/s41375-022-01543-y), 2022-04-13
Supplement: 41375_2022_1543_MOESM6_ESM.pdf [file 41375_2022_1543_MOESM6_ESM.pdf]

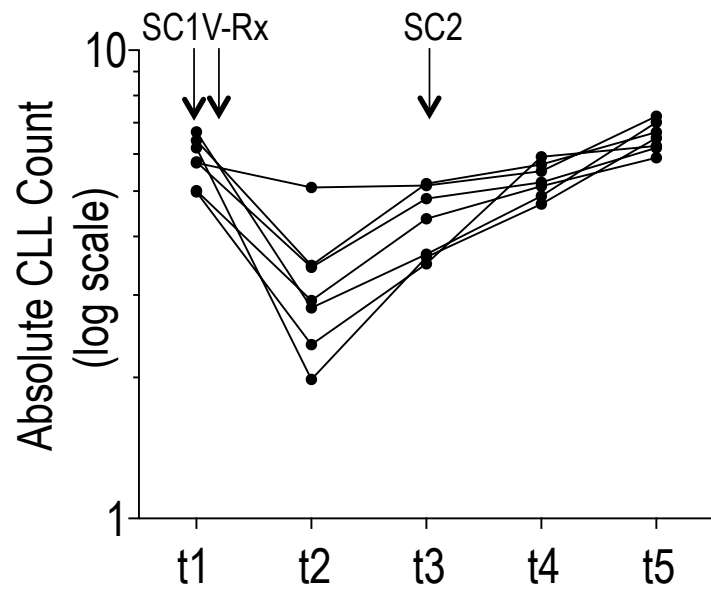

Figure S1

**A**

| Gene Sets                   | SIZE | ES   | NES  | NOM p-val | FDR q-val |
|-----------------------------|------|------|------|-----------|-----------|
| ERK1/2 TARGET GENES         | 6483 | 0.06 | 4.03 | 0.000     | 0.000     |
| NF- $\kappa$ B HALLMARK     | 192  | 0.18 | 2.89 | 0.000     | 0.000     |
| NF- $\kappa$ B TARGET GENES | 53   | 0.13 | 1.13 | 0.165     | 0.145     |

**B**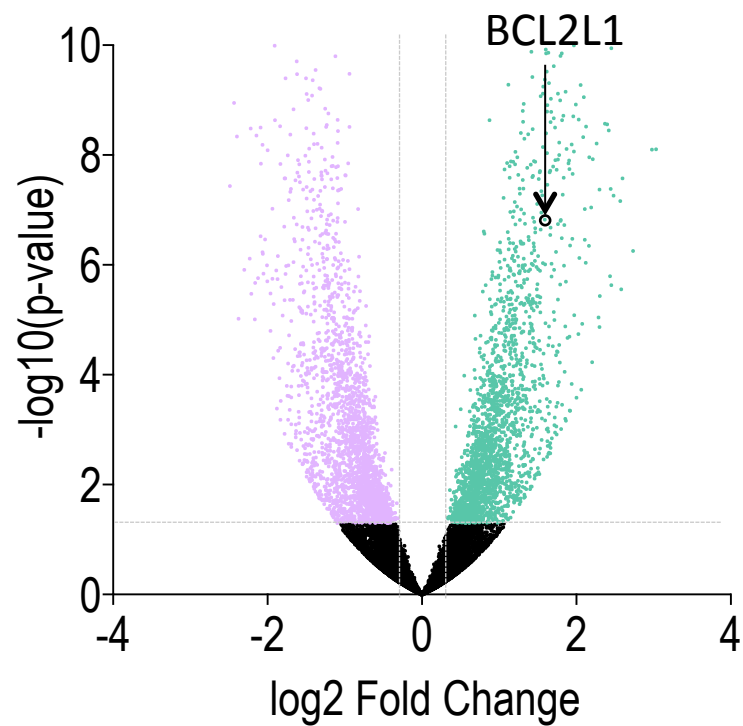

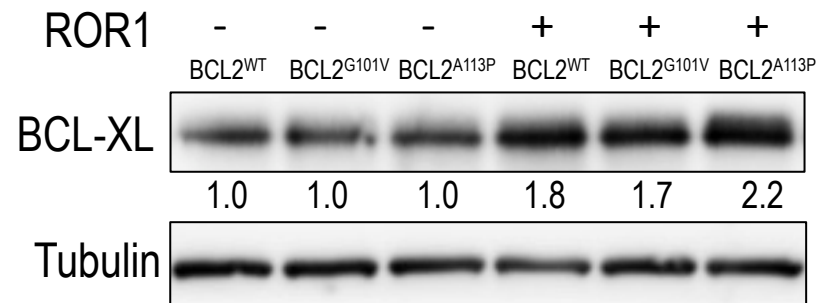

Figure S3
